# Supplementary material for: Renewable thermosetting resins and thermoplastics from vanillin
Source: Royal Society of Chemistry journal article supplement (doi:10.1039/c4gc01825g), 2014-11-27
Supplement: c4gc01825g1.pdf [file c4gc01825g1.pdf]

## Supporting Information For

### Renewable Thermosetting Resins and Thermoplastics from Vanillin

Benjamin G. Harvey<sup>a\*</sup>, Andrew J. Guenther<sup>b</sup>, Heather A. Meylemans<sup>a</sup>, Shannon R. L. Haines<sup>a</sup>, Kevin Lamison<sup>c</sup>, Thomas J. Groshens<sup>a</sup>, Lee R. Cambrea<sup>a</sup>, Matthew C. Davis<sup>a</sup>, and William W. Lai<sup>a</sup>

- a. *US NAVY, NAWCWD, Research Department, Chemistry Division, China Lake, California 93555*
- b. *Air Force Research Laboratory, Rocket Propulsion Division, Edwards AFB, California 93524*
- c. *ERC, Inc., Air Force Research Laboratory, Rocket Propulsion Division, Edwards AFB, California 93524*

## Contents

|                                                                                                                    | <u>Page</u> |
|--------------------------------------------------------------------------------------------------------------------|-------------|
| <b>X-ray data collection for compound 6</b> .....                                                                  | S2          |
| <b>Table S1. Sample and crystal data for 6</b> .....                                                               | S2          |
| <b>Table S2. Data collection and structure refinement for 6</b> .....                                              | S3          |
| <b>Table S3. Bond lengths (Å) for 6</b> .....                                                                      | S3          |
| <b>Table S4. Bond angles (°) for 6</b> .....                                                                       | S4          |
| <b>X-ray data collection for compound 7</b> .....                                                                  | S5          |
| <b>Table S5. Sample and crystal data for 7</b> .....                                                               | S5          |
| <b>Table S6. Data collection and structure refinement for 7</b> .....                                              | S6          |
| <b>Table S7. Bond lengths (Å) for 7</b> .....                                                                      | S7          |
| <b>Table S8. Bond angles (°) for 7</b> .....                                                                       | S7          |
| <b>Figure S1. <sup>1</sup>H NMR spectrum of 6 in DMF-<i>d</i><sub>7</sub></b> .....                                | S8          |
| <b>Figure S2. <sup>1</sup>H NMR spectrum of 7 in DMSO-<i>d</i><sub>6</sub></b> .....                               | S8          |
| <b>Figure S3. <sup>1</sup>H NMR spectrum (CDCl<sub>3</sub>) of the polycarbonate derived from compound 5</b> ..... | S9          |
| <b>Figure S4. Gas phase IR data of polycarbonate decomposition products</b> .....                                  | S9          |

**X-ray data collection for compound 6.** A specimen of **6**, with approximate dimensions 0.092 mm x 0.138 mm x 0.272 mm, was used for the X-ray crystallographic analysis. The X-ray intensity data were measured.

The total exposure time was 12.20 hours. The frames were integrated with the Bruker SAINT software package using a narrow-frame algorithm. The integration of the data using a monoclinic unit cell yielded a total of 8100 reflections to a maximum  $\theta$  angle of  $25.00^\circ$  (0.84 Å resolution), of which 1354 were independent (average redundancy 5.982, completeness = 100.1%,  $R_{\text{int}} = 2.86\%$ ) and 966 (71.34%) were greater than  $2\sigma(F^2)$ . The final cell constants of  $a = 3.8765(4)$  Å,  $b = 12.2303(13)$  Å,  $c = 16.1995(18)$  Å,  $\beta = 95.9060(17)^\circ$ , volume =  $763.95(14)$  Å<sup>3</sup>, are based upon the refinement of the XYZ-centroids of 1817 reflections above  $20 \sigma(I)$  with  $5.056^\circ < 2\theta < 48.36^\circ$ . Data were corrected for absorption effects using the multi-scan method (SADABS). The ratio of minimum to maximum apparent transmission was 0.920. The calculated minimum and maximum transmission coefficients (based on crystal size) are 0.9730 and 0.9910.

The final anisotropic full-matrix least-squares refinement on  $F^2$  with 126 variables converged at  $R1 = 4.06\%$ , for the observed data and  $wR2 = 10.69\%$  for all data. The goodness-of-fit was 1.033. The largest peak in the final difference electron density synthesis was  $0.265 \text{ e}/\text{Å}^3$  and the largest hole was  $-0.166 \text{ e}/\text{Å}^3$  with an RMS deviation of  $0.031 \text{ e}/\text{Å}^3$ . On the basis of the final model, the calculated density was  $1.401 \text{ g}/\text{cm}^3$  and  $F(000)$ , 336 e<sup>-</sup>.

**Table S1. Sample and crystal data for 6**

|                               |                                                  |                             |
|-------------------------------|--------------------------------------------------|-----------------------------|
| <b>Chemical formula</b>       | $\text{C}_{18}\text{H}_{14}\text{N}_2\text{O}_4$ |                             |
| <b>Formula weight</b>         | 322.31                                           |                             |
| <b>Temperature</b>            | 296(2) K                                         |                             |
| <b>Wavelength</b>             | 0.71073 Å                                        |                             |
| <b>Crystal size</b>           | 0.092 x 0.138 x 0.272 mm                         |                             |
| <b>Crystal system</b>         | monoclinic                                       |                             |
| <b>Space group</b>            | P 1 21/c 1                                       |                             |
| <b>Unit cell dimensions</b>   | $a = 3.8765(4)$ Å                                | $\alpha = 90^\circ$         |
|                               | $b = 12.2303(13)$ Å                              | $\beta = 95.9060(17)^\circ$ |
|                               | $c = 16.1995(18)$ Å                              | $\gamma = 90^\circ$         |
| <b>Volume</b>                 | $763.95(14)$ Å <sup>3</sup>                      |                             |
| <b>Z</b>                      | 2                                                |                             |
| <b>Density (calculated)</b>   | $1.401 \text{ g}/\text{cm}^3$                    |                             |
| <b>Absorption coefficient</b> | $0.101 \text{ mm}^{-1}$                          |                             |
| <b>F(000)</b>                 | 336                                              |                             |

**Table S2. Data collection and structure refinement for 6.**

**Theta range for data collection** 2.09 to  $25.00^\circ$

|                                            |                                                                                                                         |                              |
|--------------------------------------------|-------------------------------------------------------------------------------------------------------------------------|------------------------------|
| <b>Index ranges</b>                        | -4<=h<=4, -14<=k<=14, -19<=l<=19                                                                                        |                              |
| <b>Reflections collected</b>               | 8100                                                                                                                    |                              |
| <b>Independent reflections</b>             | 1354 [R(int) = 0.0286]                                                                                                  |                              |
| <b>Coverage of independent reflections</b> | 100.1%                                                                                                                  |                              |
| <b>Absorption correction</b>               | multi-scan                                                                                                              |                              |
| <b>Max. and min. transmission</b>          | 0.9910 and 0.9730                                                                                                       |                              |
| <b>Refinement method</b>                   | Full-matrix least-squares on F <sup>2</sup>                                                                             |                              |
| <b>Refinement program</b>                  | SHELXL-2013 (Sheldrick, 2013)                                                                                           |                              |
| <b>Function minimized</b>                  | $\Sigma w(F_o^2 - F_c^2)^2$                                                                                             |                              |
| <b>Data / restraints / parameters</b>      | 1354 / 0 / 126                                                                                                          |                              |
| <b>Goodness-of-fit on F<sup>2</sup></b>    | 1.033                                                                                                                   |                              |
| <b>Final R indices</b>                     | 966 data;<br>I>2 $\sigma$ (I)                                                                                           | R1 = 0.0406, wR2 =<br>0.0908 |
|                                            | all data                                                                                                                | R1 = 0.0635, wR2 =<br>0.1069 |
| <b>Weighting scheme</b>                    | w=1/[ $\sigma^2(F_o^2)+(0.0393P)^2+0.2954P$ ]<br>where P=(F <sub>o</sub> <sup>2</sup> +2F <sub>c</sub> <sup>2</sup> )/3 |                              |
| <b>Largest diff. peak and hole</b>         | 0.265 and -0.166 eÅ <sup>-3</sup>                                                                                       |                              |
| <b>R.M.S. deviation from mean</b>          | 0.031 eÅ <sup>-3</sup>                                                                                                  |                              |

**Table S3. Bond lengths (Å) for 6**

|        |          |        |           |
|--------|----------|--------|-----------|
| O1-C8  | 1.286(2) | O1-C4  | 1.428(2)  |
| O2-C5  | 1.362(2) | O2-C9  | 1.427(2)  |
| C1-C2  | 1.379(3) | C1-C6  | 1.393(3)  |
| C1-C7  | 1.473(3) | C2-C3  | 1.376(3)  |
| C2-H1  | 0.99(2)  | C3-C4  | 1.363(3)  |
| C3-H2  | 0.97(2)  | C4-C5  | 1.385(2)  |
| C5-C6  | 1.387(3) | C6-H3  | 0.921(19) |
| N1-C8  | 1.134(3) | C7-C7  | 1.298(4)  |
| C7-H4  | 0.98(3)  | C9-H9A | 0.96      |
| C9-H9B | 0.96     | C9-H9C | 0.96      |

**Table S4. Bond angles (°) for 6**

|          |            |          |            |
|----------|------------|----------|------------|
| C8-O1-C4 | 117.22(16) | C5-O2-C9 | 117.18(16) |
| C2-C1-C6 | 118.64(18) | C2-C1-C7 | 118.33(19) |
| C6-C1-C7 | 123.02(19) | C3-C2-C1 | 121.2(2)   |
| C3-C2-H1 | 118.7(14)  | C1-C2-H1 | 120.0(14)  |

---

|            |            |            |            |
|------------|------------|------------|------------|
| C4-C3-C2   | 118.8(2)   | C4-C3-H2   | 119.2(14)  |
| C2-C3-H2   | 122.1(14)  | C3-C4-C5   | 122.70(17) |
| C3-C4-O1   | 122.43(17) | C5-C4-O1   | 114.87(17) |
| O2-C5-C4   | 115.96(16) | O2-C5-C6   | 126.61(18) |
| C4-C5-C6   | 117.42(18) | C5-C6-C1   | 121.23(18) |
| C5-C6-H3   | 116.9(12)  | C1-C6-H3   | 121.8(12)  |
| C7-C7-C1   | 127.2(3)   | C7-C7-H4   | 111.5(16)  |
| C1-C7-H4   | 121.1(16)  | N1-C8-O1   | 175.7(2)   |
| O2-C9-H9A  | 109.5      | O2-C9-H9B  | 109.5      |
| H9A-C9-H9B | 109.5      | O2-C9-H9C  | 109.5      |
| H9A-C9-H9C | 109.5      | H9B-C9-H9C | 109.5      |

---

**X-ray data collection for compound 7.** A specimen of 7, approximate dimensions 0.070 mm x 0.195 mm x 0.255 mm, was used for the X-ray crystallographic analysis. The X-ray intensity data were measured.

The total exposure time was 12.20 hours. The frames were integrated with the Bruker SAINT software package using a narrow-frame algorithm. The integration of the data using a monoclinic unit cell yielded a total of 8545 reflections to a maximum  $\theta$  angle of 25.00° (0.84 Å resolution), of which 1399 were independent (average redundancy 6.108, completeness = 100.0%,  $R_{\text{int}} = 2.62\%$ ,  $R_{\text{sig}} = 1.64\%$ ) and 1097 (78.41%) were greater than  $2\sigma(F^2)$ . The final cell constants of  $a = 4.4010(3)$  Å,  $b = 12.3035(9)$  Å,  $c = 14.8314(11)$  Å,  $\beta = 97.5930(10)^\circ$ , volume = 796.04(10) Å<sup>3</sup>, are based upon the refinement of the XYZ-centroids of 2135 reflections above  $20\sigma(I)$  with  $4.317^\circ < 2\theta < 48.90^\circ$ . Data were corrected for absorption effects using the multi-scan method (SADABS). The ratio of minimum to maximum apparent transmission was 0.942. The calculated minimum and maximum transmission coefficients (based on crystal size) are 0.9760 and 0.9930.

The structure was solved and refined using the Bruker SHELXTL Software Package, using the space group P 1 21/c 1, with  $Z = 2$  for the formula unit, C<sub>18</sub>H<sub>16</sub>N<sub>2</sub>O<sub>4</sub>. The final anisotropic full-matrix least-squares refinement on  $F^2$  with 110 variables converged at  $R1 = 3.50\%$ , for the observed data and  $wR2 = 9.62\%$  for all data. The goodness-of-fit was 1.038. The largest peak in the final difference electron density synthesis was 0.115 e-/Å<sup>3</sup> and the largest hole was -0.151 e-/Å<sup>3</sup> with an RMS deviation of 0.029 e-/Å<sup>3</sup>. On the basis of the final model, the calculated density was 1.353 g/cm<sup>3</sup> and  $F(000)$ , 340 e<sup>-</sup>.

**Table S5. Sample and crystal data for 7**

|                               |                                                               |                             |
|-------------------------------|---------------------------------------------------------------|-----------------------------|
| <b>Identification code</b>    | Compound 7                                                    |                             |
| <b>Chemical formula</b>       | C <sub>18</sub> H <sub>16</sub> N <sub>2</sub> O <sub>4</sub> |                             |
| <b>Formula weight</b>         | 324.33                                                        |                             |
| <b>Temperature</b>            | 296(2) K                                                      |                             |
| <b>Wavelength</b>             | 0.71073 Å                                                     |                             |
| <b>Crystal size</b>           | 0.070 x 0.195 x 0.255 mm                                      |                             |
| <b>Crystal system</b>         | monoclinic                                                    |                             |
| <b>Space group</b>            | P 1 21/c 1                                                    |                             |
| <b>Unit cell dimensions</b>   | $a = 4.4010(3)$ Å                                             | $\alpha = 90^\circ$         |
|                               | $b = 12.3035(9)$ Å                                            | $\beta = 97.5930(10)^\circ$ |
|                               | $c = 14.8314(11)$ Å                                           | $\gamma = 90^\circ$         |
| <b>Volume</b>                 | 796.04(10) Å <sup>3</sup>                                     |                             |
| <b>Z</b>                      | 2                                                             |                             |
| <b>Density (calculated)</b>   | 1.353 g/cm <sup>3</sup>                                       |                             |
| <b>Absorption coefficient</b> | 0.097 mm <sup>-1</sup>                                        |                             |
| <b>F(000)</b>                 | 340                                                           |                             |

**Table S6. Data collection and structure refinement for 7**

|                             |                |
|-----------------------------|----------------|
| <b>Theta range for data</b> | 2.16 to 25.00° |
|-----------------------------|----------------|

---

|                                            |                                                                                                                         |
|--------------------------------------------|-------------------------------------------------------------------------------------------------------------------------|
| <b>collection</b>                          |                                                                                                                         |
| <b>Index ranges</b>                        | -5<=h<=5, -14<=k<=14, -17<=l<=17                                                                                        |
| <b>Reflections collected</b>               | 8545                                                                                                                    |
| <b>Independent reflections</b>             | 1399 [R(int) = 0.0262]                                                                                                  |
| <b>Coverage of independent reflections</b> | 100.0%                                                                                                                  |
| <b>Absorption correction</b>               | multi-scan                                                                                                              |
| <b>Max. and min. transmission</b>          | 0.9930 and 0.9760                                                                                                       |
| <b>Structure solution technique</b>        | direct methods                                                                                                          |
| <b>Structure solution program</b>          | SHELXS-97 (Sheldrick, 2008)                                                                                             |
| <b>Refinement method</b>                   | Full-matrix least-squares on F <sup>2</sup>                                                                             |
| <b>Refinement program</b>                  | SHELXL-2013 (Sheldrick, 2013)                                                                                           |
| <b>Function minimized</b>                  | $\Sigma w(F_o^2 - F_c^2)^2$                                                                                             |
| <b>Data / restraints / parameters</b>      | 1399 / 0 / 110                                                                                                          |
| <b>Goodness-of-fit on F<sup>2</sup></b>    | 1.038                                                                                                                   |
| <b>Final R indices</b>                     | 1097 data; I>2 $\sigma$ (I) R1 = 0.0350, wR2 = 0.0863                                                                   |
|                                            | all data R1 = 0.0474, wR2 = 0.0962                                                                                      |
| <b>Weighting scheme</b>                    | w=1/[ $\sigma^2(F_o^2)+(0.0423P)^2+0.1584P$ ]<br>where P=(F <sub>o</sub> <sup>2</sup> +2F <sub>c</sub> <sup>2</sup> )/3 |
| <b>Largest diff. peak and hole</b>         | 0.115 and -0.151 eÅ <sup>-3</sup>                                                                                       |
| <b>R.M.S. deviation from mean</b>          | 0.029 eÅ <sup>-3</sup>                                                                                                  |

---



---

|       |            |       |            |
|-------|------------|-------|------------|
| O2-C9 | 1.2797(18) | O2-C5 | 1.4282(16) |
| O1-C4 | 1.3596(17) | O1-C8 | 1.4257(19) |
| N1-C9 | 1.127(2)   | C5-C6 | 1.363(2)   |
| C5-C4 | 1.3838(19) | C4-C3 | 1.3845(19) |
| C3-C2 | 1.389(2)   | C3-H3 | 0.93       |
| C2-C7 | 1.380(2)   | C2-C1 | 1.5114(19) |

---

**Table S7. Bond lengths (Å) for 7**

|       |          |       |          |
|-------|----------|-------|----------|
| C1-C1 | 1.518(3) | C1-H1 | 0.97     |
| C1-H2 | 0.97     | C7-C6 | 1.388(2) |
| C7-H5 | 0.93     | C6-H4 | 0.93     |
| C8-H7 | 0.96     | C8-H8 | 0.96     |
| C8-H6 | 0.96     |       |          |

**Table S8. Bond angles (°) for 7**

|          |            |          |            |
|----------|------------|----------|------------|
| C9-O2-C5 | 118.70(12) | C4-O1-C8 | 116.78(12) |
| N1-C9-O2 | 175.05(19) | C6-C5-C4 | 122.89(13) |
| C6-C5-O2 | 123.16(13) | C4-C5-O2 | 113.95(13) |
| O1-C4-C5 | 116.35(12) | O1-C4-C3 | 126.21(13) |
| C5-C4-C3 | 117.44(14) | C4-C3-C2 | 121.37(13) |
| C4-C3-H3 | 119.3      | C2-C3-H3 | 119.3      |
| C7-C2-C3 | 118.98(13) | C7-C2-C1 | 121.60(14) |
| C3-C2-C1 | 119.40(13) | C2-C1-C1 | 112.95(15) |
| C2-C1-H1 | 109.0      | C1-C1-H1 | 109.0      |
| C2-C1-H2 | 109.0      | C1-C1-H2 | 109.0      |
| H1-C1-H2 | 107.8      | C2-C7-C6 | 120.80(14) |
| C2-C7-H5 | 119.6      | C6-C7-H5 | 119.6      |
| C5-C6-C7 | 118.52(14) | C5-C6-H4 | 120.7      |
| C7-C6-H4 | 120.7      | O1-C8-H7 | 109.5      |
| O1-C8-H8 | 109.5      | H7-C8-H8 | 109.5      |
| O1-C8-H6 | 109.5      | H7-C8-H6 | 109.5      |
| H8-C8-H6 | 109.5      |          |            |

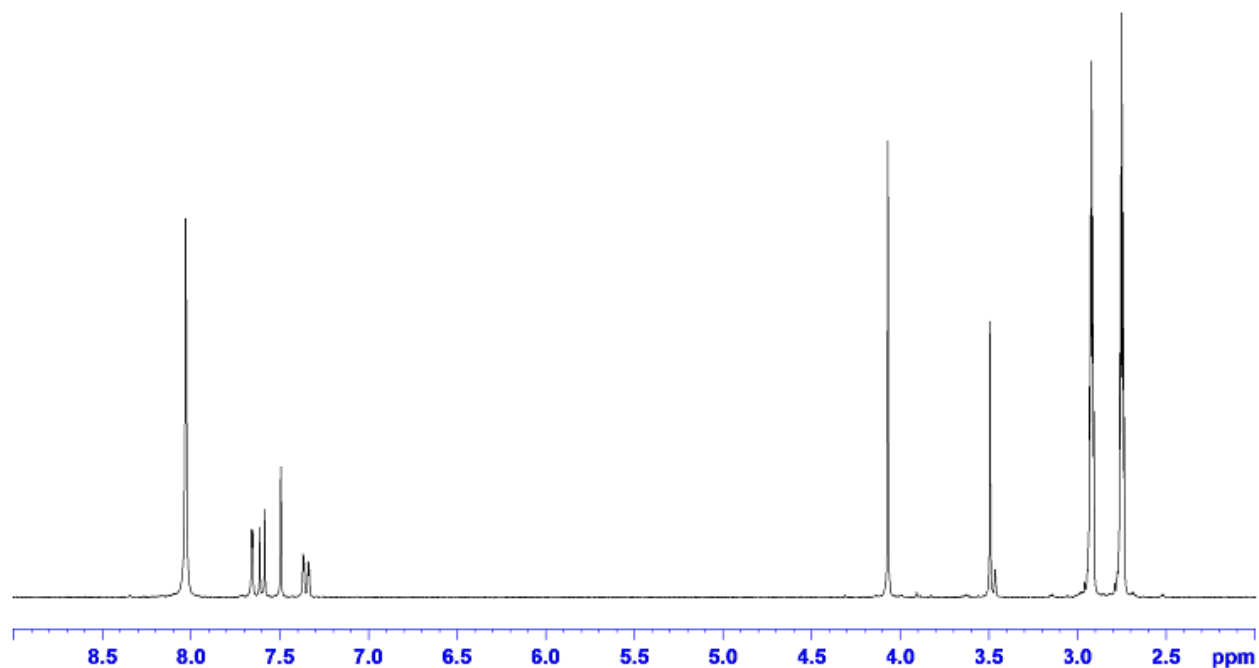

Figure S1.  $^1\text{H}$  NMR spectrum of compound 6 in  $\text{DMF-}d_7$

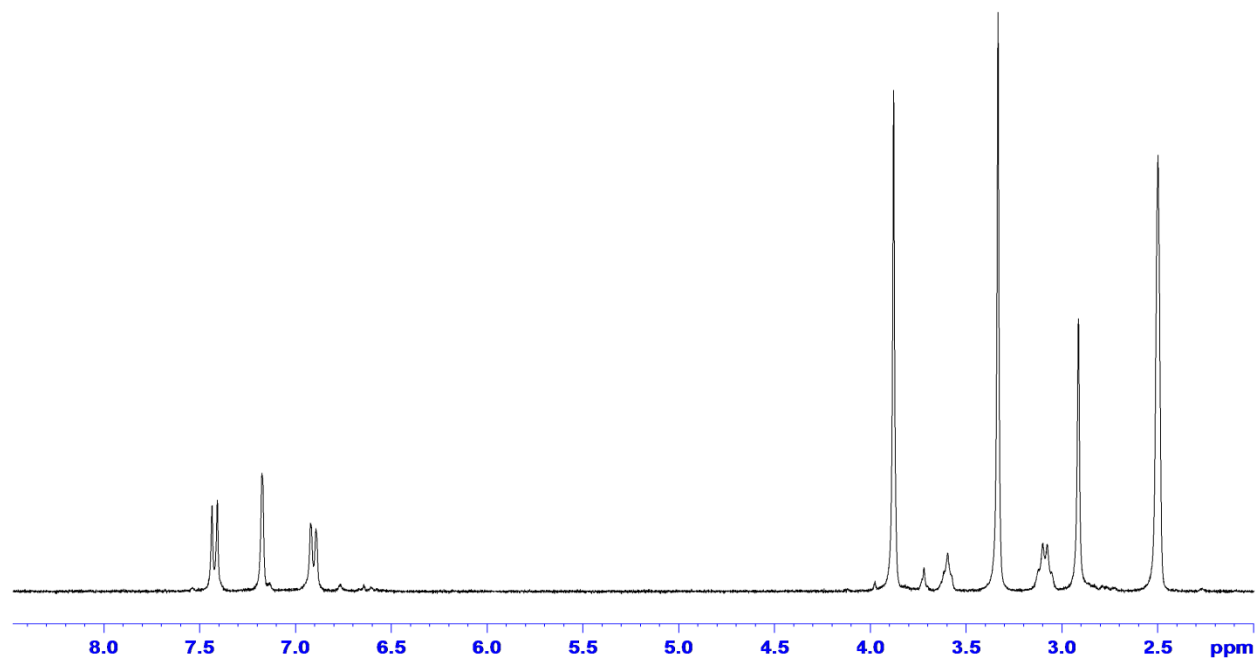

Figure S2.  $^1\text{H}$  NMR spectrum of compound 7 in  $\text{DMSO-}d_6$ . Due to the very low solubility of compound 7 in common organic solvents including DMSO, the resonances due to impurities are highly exaggerated. For example, THF can be observed at  $\sim 3.6$  ppm, water (from the NMR solvent) at  $\sim 3.3$  ppm, and triethylamine hydrochloride at  $\sim 3.2$  ppm



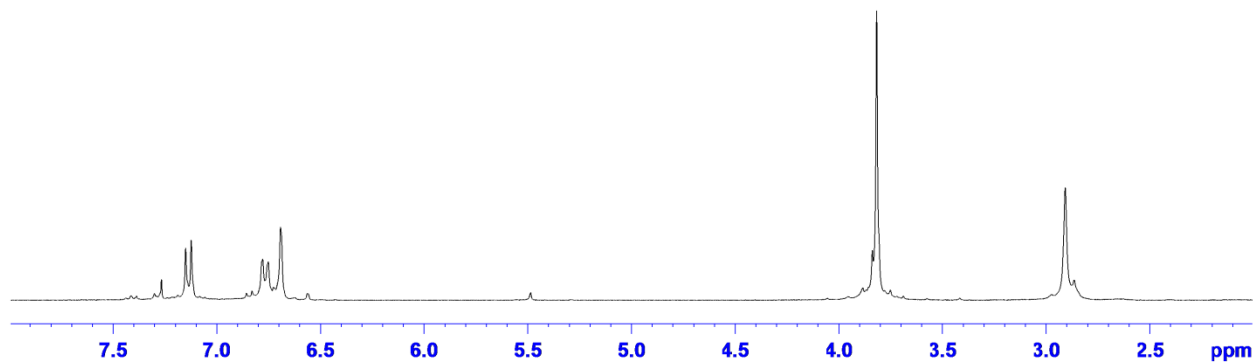

Figure S3. <sup>1</sup>H NMR spectrum (CDCl<sub>3</sub>) of the polycarbonate derived from compound **5**

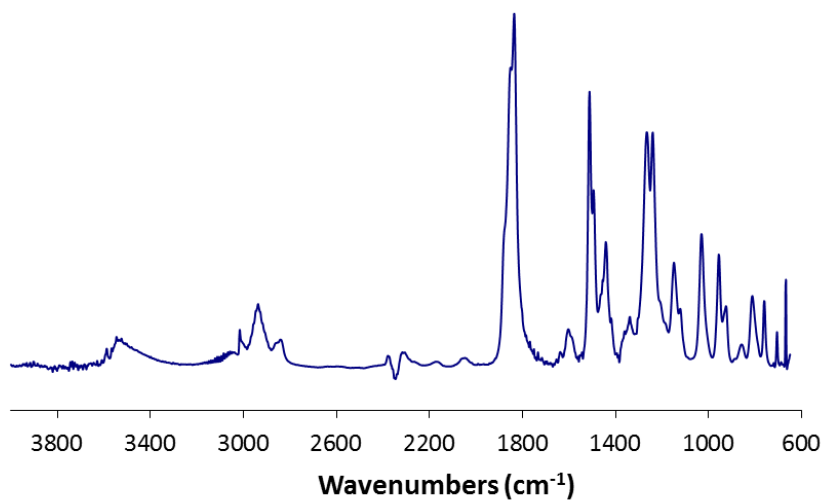

Figure S4. Gas phase IR data of polycarbonate decomposition products
